# Supplementary material
Source: Elsevier journal article supplement (https://www.sciencedirect.com/science/article/pii/S0213911122001649)
Supplement: mmc1 [file S0213911122001649:mmc1.doc]

**Appendix**

**Table I**

Differences in non-standardized and standardized values of the percentage of low birthweight. Spain, 1996-2020.
